# Supplementary material for: Kihi-to, a herbal traditional medicine, improves Abeta(25–35)-induced memory impairment and losses of neurites and synapses
Source: PubMed Central journal article supplement (PMC2532680; doi:10.1186/1472-6882-8-49), 2008-08-16

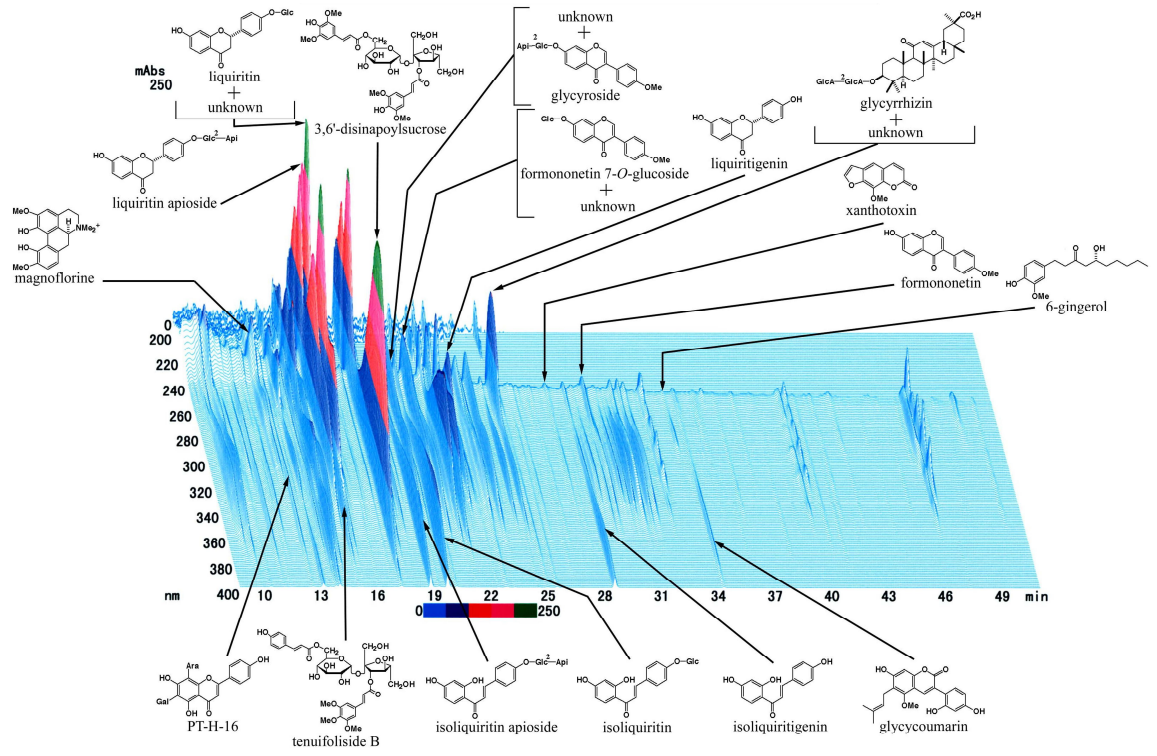

Supplement: 1472-6882-8-49-S1.pdf [file 1472-6882-8-49-S1.pdf]
